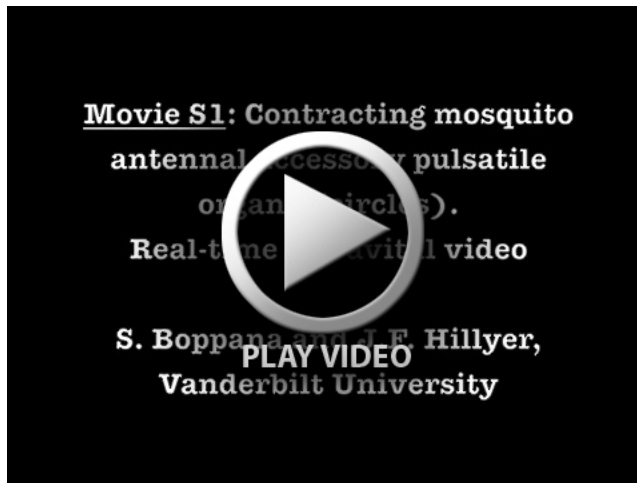

**Movie 1.** Contracting mosquito antennal accessory pulsatile organs.

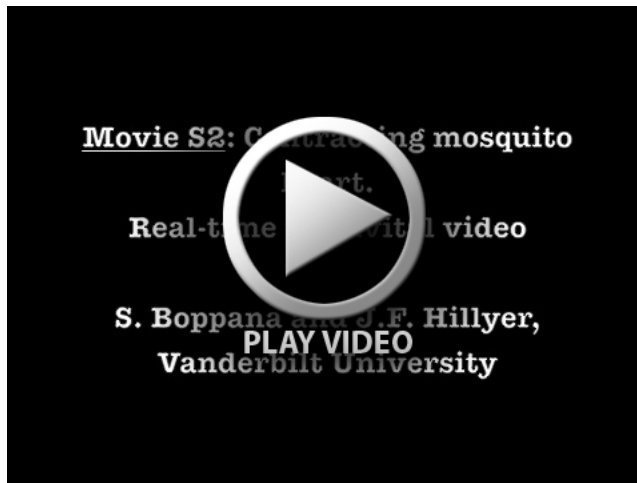

**Movie 2.** Contracting mosquito heart.

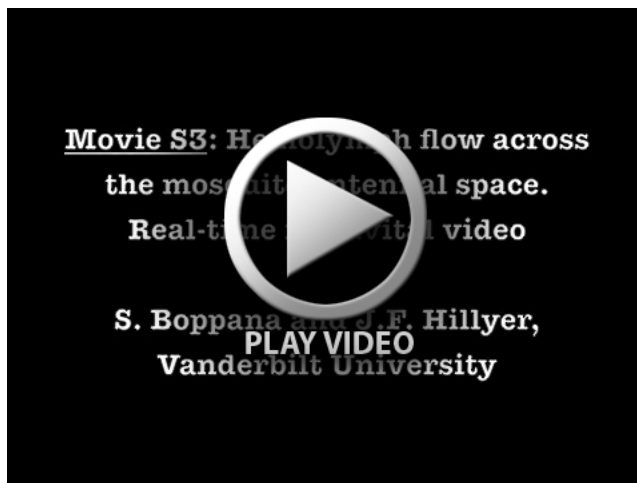

**Movie 3.** Hemolymph flow across the mosquito antennal space.
